# Supplementary material for: Mytilus trossulus in Northern Europe
Source: PubMed Central journal article supplement — Mar Biol. 2011 Jan 21;158(4):817–33. doi: 10.1007/s00227-010-1609-z (PMC3873017; doi:10.1007/s00227-010-1609-z), 2011-01-21
Supplement: 227_2010_1609_MOESM1_ESM.pdf [file 227_2010_1609_MOESM1_ESM.pdf]

**Electronic supplement 1.** Main data set. Allele frequencies estimated from 8 allozyme loci in 44 samples of *Mytilus*. Sample codes are as in Fig. 1 and Table 1 of the paper.

| code                               | Locality                               | <i>Est</i> |      |      |      |     | <i>Odh</i> |      |      |      |      | <i>Pgm</i> |     |      |      |      | <i>Gpi</i> |      |      |     |      | N    |      |      |      |      |      |      |      |     |
|------------------------------------|----------------------------------------|------------|------|------|------|-----|------------|------|------|------|------|------------|-----|------|------|------|------------|------|------|-----|------|------|------|------|------|------|------|------|------|-----|
|                                    |                                        | 90         | 95   | 100  | 110  | N   | 90         | 95   | 100  | 105  | 108  | 110        | N   | 90   | 95   | 100  | 110        | 120  | 125  | N   | 86   |      | 93   | 96   | 98   | 100  | 102  | 105  | 107  | 110 |
| North American <i>M. trossulus</i> |                                        |            |      |      |      |     |            |      |      |      |      |            |     |      |      |      |            |      |      |     |      |      |      |      |      |      |      |      |      |     |
| 1                                  | Whidbey Isl., Wa.                      | 0.99       | 0.00 | 0.01 | 0.00 | 43  | 0.00       | 0.23 | 0.17 | 0.53 | 0.05 | 0.03       | 33  | 0.00 | 0.00 | 0.05 | 0.29       | 0.50 | 0.16 | 28  | 0.04 | 0.23 | 0.06 | 0.57 | 0.07 | 0.04 | 0.00 | 0.00 | 0.00 | 42  |
| 2                                  | Driftwood Key, Wa.                     | 0.95       | 0.02 | 0.02 | 0.02 | 57  | 0.05       | 0.10 | 0.25 | 0.55 | 0.02 | 0.03       | 67  | 0.00 | 0.00 | 0.08 | 0.27       | 0.55 | 0.10 | 39  | 0.04 | 0.15 | 0.02 | 0.64 | 0.10 | 0.04 | 0.00 | 0.01 | 0.00 | 69  |
| 3                                  | St Andrews, N.B.                       | 0.97       | 0.00 | 0.03 | 0.00 | 51  | 0.04       | 0.01 | 0.17 | 0.77 | 0.02 | 0.00       | 63  | 0.00 | 0.00 | 0.07 | 0.23       | 0.59 | 0.11 | 37  | 0.08 | 0.14 | 0.08 | 0.62 | 0.06 | 0.02 | 0.00 | 0.00 | 0.00 | 61  |
| <i>M. edulis</i> reference         |                                        |            |      |      |      |     |            |      |      |      |      |            |     |      |      |      |            |      |      |     |      |      |      |      |      |      |      |      |      |     |
| 4                                  | Searsport, Me. USA                     | 0.02       | 0.01 | 0.95 | 0.01 | 42  | 0.01       | 0.02 | 0.85 | 0.01 | 0.05 | 0.06       | 44  | 0.04 | 0.01 | 0.73 | 0.10       | 0.11 | 0.00 | 45  | 0.04 | 0.05 | 0.01 | 0.05 | 0.10 | 0.34 | 0.16 | 0.21 | 0.03 | 46  |
| 6                                  | Jarfjorden, Barents Sea NO             | 0.00       | 0.00 | 0.96 | 0.04 | 26  | 0.02       | 0.00 | 0.87 | 0.02 | 0.02 | 0.07       | 27  | 0.02 | 0.02 | 0.81 | 0.15       | 0.00 | 0.00 | 26  | 0.02 | 0.02 | 0.00 | 0.02 | 0.05 | 0.20 | 0.09 | 0.59 | 0.02 | 28  |
| 7                                  | Hjerting, North Sea DK                 | 0.02       | 0.00 | 0.93 | 0.04 | 156 | 0.03       | 0.01 | 0.93 | 0.01 | 0.01 | 0.01       | 152 | 0.02 | 0.10 | 0.62 | 0.26       | 0.00 | 0.00 | 143 | 0.00 | 0.01 | 0.01 | 0.03 | 0.01 | 0.36 | 0.02 | 0.53 | 0.03 | 152 |
| Baltic transect                    |                                        |            |      |      |      |     |            |      |      |      |      |            |     |      |      |      |            |      |      |     |      |      |      |      |      |      |      |      |      |     |
| 8                                  | Egense, DK                             | 0.12       | 0.05 | 0.82 | 0.02 | 120 | 0.07       | 0.04 | 0.71 | 0.07 | 0.04 | 0.07       | 99  | 0.07 | 0.02 | 0.69 | 0.12       | 0.09 | 0.01 | 90  | 0.00 | 0.02 | 0.03 | 0.16 | 0.02 | 0.18 | 0.08 | 0.48 | 0.03 | 114 |
| 9                                  | Taarbæk, DK                            | 0.33       | 0.16 | 0.51 | 0.01 | 150 | 0.02       | 0.03 | 0.60 | 0.26 | 0.05 | 0.04       | 147 | 0.05 | 0.02 | 0.47 | 0.12       | 0.29 | 0.04 | 147 | 0.01 | 0.10 | 0.02 | 0.37 | 0.05 | 0.07 | 0.05 | 0.32 | 0.01 | 150 |
| 10                                 | Sölvesborg, SE                         | 0.78       | 0.17 | 0.05 | 0.00 | 120 | 0.01       | 0.00 | 0.34 | 0.59 | 0.02 | 0.03       | 120 | 0.00 | 0.00 | 0.04 | 0.04       | 0.78 | 0.14 | 118 | 0.02 | 0.03 | 0.01 | 0.92 | 0.00 | 0.00 | 0.00 | 0.02 | 0.00 | 120 |
| 12                                 | Hanko Tvärminne, FI                    | 0.86       | 0.12 | 0.00 | 0.01 | 37  | 0.01       | 0.00 | 0.24 | 0.66 | 0.00 | 0.08       | 37  | 0.00 | 0.00 | 0.01 | 0.08       | 0.71 | 0.19 | 36  | 0.01 | 0.03 | 0.01 | 0.95 | 0.00 | 0.00 | 0.00 | 0.00 | 0.00 | 38  |
| 13                                 | Tammisaari Vitsand, FI                 | 0.84       | 0.16 | 0.00 | 0.00 | 46  | 0.00       | 0.01 | 0.24 | 0.68 | 0.00 | 0.07       | 52  | 0.00 | 0.00 | 0.03 | 0.16       | 0.72 | 0.09 | 44  | 0.02 | 0.01 | 0.00 | 0.96 | 0.00 | 0.00 | 0.00 | 0.01 | 0.00 | 51  |
| North Sea / Norwegian Sea          |                                        |            |      |      |      |     |            |      |      |      |      |            |     |      |      |      |            |      |      |     |      |      |      |      |      |      |      |      |      |     |
| 14                                 | Bergen city harbor 2001                | 0.52       | 0.16 | 0.32 | 0.00 | 25  | 0.00       | 0.00 | 0.28 | 0.70 | 0.00 | 0.02       | 25  | 0.06 | 0.00 | 0.16 | 0.20       | 0.58 | 0.00 | 25  | 0.02 | 0.04 | 0.00 | 0.56 | 0.00 | 0.14 | 0.06 | 0.18 | 0.00 | 25  |
| 15                                 | Bergen city harbor 2004                | 0.60       | 0.07 | 0.34 | 0.00 | 67  | 0.00       | 0.00 | 0.28 | 0.71 | 0.01 | 0.00       | 70  | 0.06 | 0.00 | 0.19 | 0.11       | 0.64 | 0.01 | 70  | 0.03 | 0.04 | 0.02 | 0.68 | 0.01 | 0.06 | 0.03 | 0.14 | 0.01 | 71  |
| 16                                 | Bergen Espeland 2001                   | 0.06       | 0.00 | 0.91 | 0.03 | 17  | 0.00       | 0.00 | 0.88 | 0.00 | 0.00 | 0.13       | 12  | 0.06 | 0.00 | 0.85 | 0.06       | 0.00 | 0.03 | 17  | 0.00 | 0.00 | 0.00 | 0.03 | 0.06 | 0.32 | 0.09 | 0.44 | 0.06 | 17  |
| 17                                 | Bergen Espeland 2004                   | 0.33       | 0.00 | 0.67 | 0.00 | 47  | 0.10       | 0.00 | 0.60 | 0.25 | 0.04 | 0.01       | 40  | 0.09 | 0.00 | 0.51 | 0.21       | 0.17 | 0.02 | 46  | 0.00 | 0.02 | 0.01 | 0.15 | 0.05 | 0.29 | 0.13 | 0.33 | 0.02 | 47  |
| 18                                 | North Trondelag                        | 0.01       | 0.02 | 0.96 | 0.01 | 45  | 0.05       | 0.00 | 0.83 | 0.02 | 0.05 | 0.06       | 43  | 0.12 | 0.01 | 0.57 | 0.29       | 0.01 | 0.00 | 43  | 0.03 | 0.01 | 0.00 | 0.08 | 0.01 | 0.27 | 0.03 | 0.56 | 0.01 | 39  |
| 19                                 | Tromsø                                 | 0.15       | 0.01 | 0.82 | 0.02 | 86  | 0.09       | 0.00 | 0.74 | 0.06 | 0.02 | 0.09       | 62  | 0.05 | 0.00 | 0.62 | 0.18       | 0.04 | 0.06 | 86  | 0.01 | 0.00 | 0.00 | 0.11 | 0.02 | 0.21 | 0.04 | 0.58 | 0.02 | 84  |
| Barents Sea                        |                                        |            |      |      |      |     |            |      |      |      |      |            |     |      |      |      |            |      |      |     |      |      |      |      |      |      |      |      |      |     |
| 20                                 | Kirkenes, NO                           | 0.49       | 0.03 | 0.49 | 0.00 | 74  | 0.03       | 0.00 | 0.45 | 0.43 | 0.04 | 0.04       | 74  | 0.08 | 0.00 | 0.28 | 0.27       | 0.25 | 0.14 | 74  | 0.06 | 0.01 | 0.03 | 0.37 | 0.06 | 0.19 | 0.01 | 0.27 | 0.00 | 75  |
| 21                                 | Pechenga, RU                           | 0.06       | 0.00 | 0.92 | 0.02 | 45  | 0.01       | 0.02 | 0.78 | 0.03 | 0.02 | 0.13       | 44  | 0.07 | 0.08 | 0.68 | 0.17       | 0.01 | 0.00 | 45  | 0.00 | 0.04 | 0.02 | 0.03 | 0.04 | 0.30 | 0.04 | 0.49 | 0.02 | 45  |
| 22                                 | Kola Bay, Abram Mys                    | 0.86       | 0.01 | 0.10 | 0.03 | 115 | 0.01       | 0.02 | 0.23 | 0.66 | 0.04 | 0.03       | 122 | 0.01 | 0.00 | 0.18 | 0.25       | 0.51 | 0.05 | 122 | 0.15 | 0.07 | 0.17 | 0.48 | 0.06 | 0.03 | 0.00 | 0.04 | 0.00 | 121 |
| 23                                 | Kola Bay, Mishukovo                    | 0.88       | 0.06 | 0.06 | 0.00 | 106 | 0.01       | 0.01 | 0.14 | 0.80 | 0.03 | 0.01       | 110 | 0.01 | 0.00 | 0.12 | 0.32       | 0.45 | 0.10 | 106 | 0.10 | 0.06 | 0.10 | 0.55 | 0.09 | 0.04 | 0.01 | 0.05 | 0.01 | 110 |
| 24                                 | Kola Bay, Tyuva inlet<br>(clusters)    | 0.20       | 0.01 | 0.75 | 0.03 | 108 | 0.03       | 0.00 | 0.75 | 0.16 | 0.02 | 0.03       | 106 | 0.06 | 0.00 | 0.68 | 0.16       | 0.09 | 0.01 | 107 | 0.02 | 0.02 | 0.04 | 0.10 | 0.08 | 0.20 | 0.07 | 0.44 | 0.03 | 109 |
| 25                                 | Kola Bay, Tyuva inlet<br>(mussel bank) | 0.26       | 0.01 | 0.73 | 0.01 | 64  | 0.06       | 0.01 | 0.59 | 0.24 | 0.01 | 0.09       | 65  | 0.03 | 0.00 | 0.61 | 0.19       | 0.14 | 0.03 | 66  | 0.07 | 0.00 | 0.03 | 0.14 | 0.10 | 0.23 | 0.05 | 0.37 | 0.02 | 66  |

|    |                              |                     |    |                               |    |                               |    |                                              |    |
|----|------------------------------|---------------------|----|-------------------------------|----|-------------------------------|----|----------------------------------------------|----|
| 26 | Kildin Isl., Mogilnaya Inlet | 0.13 0.01 0.84 0.03 | 52 | 0.06 0.02 0.68 0.09 0.07 0.08 | 53 | 0.05 0.04 0.68 0.14 0.08 0.02 | 54 | 0.01 0.02 0.00 0.06 0.02 0.27 0.09 0.47 0.06 | 54 |
| 28 | Kildin Isl., Sunduki         | 0.10 0.00 0.89 0.01 | 53 | 0.09 0.01 0.71 0.08 0.06 0.06 | 52 | 0.06 0.04 0.61 0.19 0.08 0.02 | 54 | 0.01 0.03 0.00 0.06 0.04 0.21 0.03 0.60 0.02 | 54 |
| 29 | Yarnishnaya 2001             | 0.11 0.03 0.78 0.08 | 36 | 0.04 0.00 0.80 0.07 0.03 0.06 | 35 | 0.04 0.01 0.74 0.15 0.06 0.00 | 36 | 0.00 0.01 0.00 0.06 0.03 0.25 0.08 0.51 0.06 | 36 |
| 30 | Yarnishnaya 2002             | 0.20 0.01 0.77 0.02 | 48 | 0.04 0.01 0.64 0.19 0.02 0.10 | 47 | 0.06 0.02 0.59 0.21 0.11 0.01 | 47 | 0.04 0.01 0.02 0.10 0.06 0.27 0.02 0.46 0.01 | 48 |
| 31 | Gremikha 2001                | 0.93 0.05 0.02 0.00 | 28 | 0.05 0.00 0.19 0.67 0.03 0.05 | 29 | 0.02 0.00 0.14 0.26 0.50 0.09 | 29 | 0.14 0.10 0.16 0.53 0.02 0.03 0.00 0.02 0.00 | 29 |
| 32 | Gremikha 2002                | 0.82 0.03 0.15 0.00 | 36 | 0.04 0.00 0.21 0.66 0.00 0.09 | 34 | 0.03 0.01 0.20 0.24 0.43 0.09 | 35 | 0.07 0.08 0.18 0.50 0.06 0.03 0.00 0.07 0.01 | 36 |
| 33 | Kanin Nos                    | 0.04 0.02 0.94 0.01 | 56 | 0.04 0.00 0.89 0.02 0.01 0.04 | 57 | 0.05 0.05 0.77 0.11 0.02 0.00 | 56 | 0.00 0.01 0.00 0.01 0.05 0.22 0.07 0.60 0.04 | 57 |
| 34 | Dolgy Island                 | 0.04 0.04 0.90 0.02 | 25 | 0.02 0.00 0.88 0.04 0.06 0.00 | 26 | 0.00 0.10 0.73 0.15 0.02 0.00 | 24 | 0.00 0.00 0.00 0.00 0.02 0.29 0.06 0.56 0.08 | 26 |
| 35 | Vaigach                      | 0.01 0.00 0.98 0.01 | 45 | 0.02 0.00 0.91 0.00 0.02 0.04 | 46 | 0.17 0.00 0.64 0.19 0.00 0.00 | 44 | 0.00 0.01 0.00 0.01 0.02 0.22 0.11 0.57 0.06 | 45 |

White Sea

|    |                         |                     |    |                               |    |                               |    |                                              |    |
|----|-------------------------|---------------------|----|-------------------------------|----|-------------------------------|----|----------------------------------------------|----|
| 36 | Olenitsa                | 0.09 0.00 0.90 0.01 | 57 | 0.08 0.00 0.81 0.01 0.03 0.08 | 58 | 0.11 0.04 0.62 0.22 0.01 0.00 | 58 | 0.00 0.03 0.00 0.02 0.05 0.24 0.04 0.59 0.03 | 58 |
| 37 | Umba 2002               | 0.69 0.04 0.26 0.01 | 71 | 0.01 0.01 0.36 0.59 0.01 0.03 | 69 | 0.03 0.01 0.17 0.24 0.47 0.07 | 69 | 0.14 0.10 0.10 0.44 0.04 0.07 0.04 0.06 0.01 | 71 |
| 38 | Umba 2004               | 0.02 0.02 0.96 0.00 | 23 | 0.04 0.00 0.87 0.02 0.07 0.00 | 23 | 0.04 0.00 0.85 0.11 0.00 0.00 | 23 | 0.00 0.00 0.00 0.03 0.03 0.30 0.08 0.58 0.00 | 20 |
| 39 | Luvenga                 | 0.13 0.00 0.84 0.03 | 48 | 0.00 0.03 0.84 0.05 0.02 0.05 | 48 | 0.12 0.13 0.59 0.14 0.02 0.01 | 47 | 0.01 0.01 0.01 0.07 0.06 0.24 0.05 0.48 0.06 | 48 |
| 40 | Kartesh 1990            | 0.01 0.00 0.98 0.01 | 40 | 0.05 0.00 0.73 0.10 0.01 0.11 | 40 | 0.08 0.03 0.72 0.17 0.00 0.00 | 30 | 0.01 0.01 0.00 0.03 0.03 0.24 0.01 0.64 0.03 | 39 |
| 41 | Matrenin 2001           | 0.12 0.02 0.86 0.00 | 45 | 0.06 0.02 0.85 0.01 0.01 0.05 | 44 | 0.12 0.01 0.67 0.20 0.00 0.00 | 45 | 0.00 0.00 0.00 0.01 0.08 0.26 0.08 0.56 0.02 | 45 |
| 42 | Keret                   | 0.05 0.01 0.92 0.02 | 42 | 0.07 0.00 0.81 0.03 0.02 0.06 | 43 | 0.19 0.02 0.60 0.17 0.01 0.00 | 43 | 0.00 0.02 0.00 0.03 0.08 0.23 0.05 0.58 0.00 | 43 |
| 43 | Rabocheostrovsk         | 0.04 0.00 0.95 0.01 | 48 | 0.04 0.00 0.89 0.02 0.02 0.03 | 48 | 0.26 0.00 0.63 0.11 0.01 0.00 | 47 | 0.00 0.00 0.00 0.05 0.07 0.20 0.03 0.60 0.04 | 48 |
| 44 | Solovetsky Island       | 0.00 0.00 0.95 0.05 | 19 | 0.03 0.05 0.82 0.05 0.00 0.05 | 19 | 0.13 0.00 0.76 0.11 0.00 0.00 | 19 | 0.00 0.00 0.00 0.03 0.03 0.29 0.05 0.61 0.00 | 19 |
| 45 | Tamitsa, Onega Bay      | 0.04 0.00 0.96 0.00 | 24 | 0.08 0.00 0.60 0.04 0.08 0.19 | 24 | 0.10 0.02 0.81 0.06 0.00 0.00 | 24 | 0.00 0.00 0.00 0.04 0.04 0.17 0.02 0.71 0.02 | 24 |
| 46 | Una Inlet, Dvina Bay    | 0.02 0.02 0.96 0.00 | 24 | 0.04 0.00 0.78 0.07 0.07 0.04 | 23 | 0.21 0.00 0.63 0.17 0.00 0.00 | 24 | 0.00 0.02 0.00 0.02 0.09 0.11 0.11 0.57 0.09 | 23 |
| 47 | Yagry Island, Dvina Bay | 0.06 0.01 0.92 0.01 | 71 | 0.05 0.01 0.82 0.06 0.02 0.04 | 67 | 0.12 0.08 0.64 0.11 0.04 0.01 | 71 | 0.01 0.01 0.01 0.03 0.02 0.27 0.04 0.52 0.08 | 71 |

## Electronic supplement 1, continued

| Code                               | <i>Idh</i>                                   |            |            |            |            | <i>N</i> | <i>Ap (Pep)</i> |           |            |            |            | <i>Lap</i> |           |           |           |           | <i>N</i> | <i>Mpi</i> |           |           |           |            |          |     |
|------------------------------------|----------------------------------------------|------------|------------|------------|------------|----------|-----------------|-----------|------------|------------|------------|------------|-----------|-----------|-----------|-----------|----------|------------|-----------|-----------|-----------|------------|----------|-----|
|                                    | <i>93</i>                                    | <i>100</i> | <i>102</i> | <i>107</i> | <i>114</i> |          | <i>90</i>       | <i>95</i> | <i>100</i> | <i>105</i> | <i>110</i> | <i>N</i>   | <i>92</i> | <i>94</i> | <i>96</i> | <i>98</i> |          | <i>100</i> | <i>87</i> | <i>90</i> | <i>94</i> | <i>100</i> | <i>N</i> |     |
| North American <i>M. trossulus</i> |                                              |            |            |            |            |          |                 |           |            |            |            |            |           |           |           |           |          |            |           |           |           |            |          |     |
| 1                                  | Whidbey Isl., Wa.                            | 0.02       | 0.64       | 0.00       | 0.32       | 0.01     | 42              | 0.00      | 0.10       | 0.72       | 0.18       | 0.00       | 39        | 0.09      | 0.56      | 0.31      | 0.03     | 0.01       | 34        | 0.03      | 0.00      | 0.94       | 0.02     | 43  |
| 2                                  | Driftwood Key, Wa.                           | 0.05       | 0.69       | 0.00       | 0.25       | 0.01     | 66              | 0.07      | 0.06       | 0.66       | 0.20       | 0.01       | 59        | 0.02      | 0.43      | 0.50      | 0.05     | 0.00       | 48        | 0.04      | 0.00      | 0.95       | 0.01     | 51  |
| 3                                  | St Andrews, N.B.                             | 0.04       | 0.68       | 0.00       | 0.27       | 0.01     | 57              | 0.17      | 0.06       | 0.40       | 0.32       | 0.06       | 63        | 0.09      | 0.30      | 0.46      | 0.13     | 0.02       | 61        | 0.01      | 0.01      | 0.96       | 0.02     | 63  |
| <i>M. edulis</i> reference         |                                              |            |            |            |            |          |                 |           |            |            |            |            |           |           |           |           |          |            |           |           |           |            |          |     |
| 4                                  | Searsport, Me. USA                           | 0.62       | 0.21       | 0.04       | 0.12       | 0.00     | 45              | 0.25      | 0.03       | 0.30       | 0.40       | 0.01       | 46        | 0.01      | 0.06      | 0.43      | 0.49     | 0.01       | 43        | 0.01      | 0.03      | 0.03       | 0.92     | 44  |
| 6                                  | Jarfjorden, Barents Sea NO                   | 0.31       | 0.45       | 0.02       | 0.22       | 0.00     | 29              | 0.05      | 0.03       | 0.71       | 0.17       | 0.03       | 29        | 0.00      | 0.06      | 0.56      | 0.39     | 0.00       | 27        | 0.00      | 0.00      | 0.00       | 1.00     | 26  |
| 7                                  | Hjerting, North Sea DK                       | 0.42       | 0.40       | 0.02       | 0.14       | 0.02     | 59              | 0.01      | 0.01       | 0.81       | 0.13       | 0.04       | 157       | 0.03      | 0.15      | 0.59      | 0.22     | 0.00       | 112       | 0.00      | 0.02      | 0.00       | 0.98     | 157 |
| Baltic transect                    |                                              |            |            |            |            |          |                 |           |            |            |            |            |           |           |           |           |          |            |           |           |           |            |          |     |
| 8                                  | Egense, DK                                   | 0.31       | 0.44       | 0.04       | 0.20       | 0.02     | 112             | 0.06      | 0.02       | 0.66       | 0.25       | 0.01       | 119       | 0.02      | 0.08      | 0.57      | 0.30     | 0.03       | 82        | 0.03      | 0.02      | 0.11       | 0.84     | 120 |
| 9                                  | Taarbaek, DK                                 | 0.22       | 0.54       | 0.09       | 0.12       | 0.02     | 150             | 0.05      | 0.01       | 0.69       | 0.23       | 0.02       | 150       | 0.01      | 0.16      | 0.42      | 0.16     | 0.24       | 149       | 0.10      | 0.01      | 0.35       | 0.54     | 150 |
| 10                                 | Sölvesborg, SE                               | 0.03       | 0.78       | 0.01       | 0.18       | 0.00     | 120             | 0.05      | 0.01       | 0.75       | 0.19       | 0.01       | 118       | 0.00      | 0.15      | 0.31      | 0.02     | 0.51       | 115       | 0.11      | 0.00      | 0.76       | 0.12     | 120 |
| 12                                 | Hanko Tvärminne, FI                          | 0.02       | 0.84       | 0.00       | 0.14       | 0.00     | 22              | 0.09      | 0.00       | 0.77       | 0.14       | 0.00       | 37        | 0.00      | 0.23      | 0.40      | 0.00     | 0.38       | 20        | 0.04      | 0.08      | 0.83       | 0.04     | 12  |
| 13                                 | Tammisaari Vitsand, FI                       | 0.00       | 0.80       | 0.00       | 0.20       | 0.00     | 48              | 0.05      | 0.00       | 0.89       | 0.05       | 0.00       | 47        | 0.00      | 0.13      | 0.26      | 0.00     | 0.61       | 50        | 0.05      | 0.00      | 0.86       | 0.09     | 49  |
| North Sea / Norwegian Sea          |                                              |            |            |            |            |          |                 |           |            |            |            |            |           |           |           |           |          |            |           |           |           |            |          |     |
| 14                                 | Bergen city harbor 2001                      | 0.22       | 0.54       | 0.04       | 0.17       | 0.02     | 23              | 0.04      | 0.02       | 0.60       | 0.34       | 0.00       | 25        | 0.04      | 0.40      | 0.36      | 0.10     | 0.10       | 25        | 0.00      | 0.00      | 0.71       | 0.29     | 24  |
| 15                                 | Bergen city harbor 2004                      | 0.14       | 0.68       | 0.00       | 0.14       | 0.05     | 66              | 0.01      | 0.02       | 0.66       | 0.28       | 0.03       | 69        | 0.10      | 0.33      | 0.30      | 0.13     | 0.14       | 66        | 0.01      | 0.02      | 0.73       | 0.23     | 45  |
| 16                                 | Bergen Espeland 2001                         | 0.37       | 0.43       | 0.00       | 0.17       | 0.03     | 15              | 0.06      | 0.09       | 0.65       | 0.18       | 0.03       | 17        | 0.00      | 0.18      | 0.59      | 0.24     | 0.00       | 17        | 0.00      | 0.12      | 0.06       | 0.82     | 17  |
| 17                                 | Bergen Espeland 2004                         | 0.26       | 0.56       | 0.00       | 0.19       | 0.00     | 45              | 0.01      | 0.03       | 0.72       | 0.22       | 0.02       | 46        | 0.03      | 0.14      | 0.61      | 0.19     | 0.03       | 47        | 0.00      | 0.14      | 0.33       | 0.53     | 33  |
| 18                                 | N Trondelag                                  | 0.25       | 0.41       | 0.09       | 0.20       | 0.05     | 22              | 0.06      | 0.02       | 0.63       | 0.30       | 0.00       | 44        | 0.02      | 0.03      | 0.53      | 0.41     | 0.02       | 29        | 0.00      | 0.05      | 0.00       | 0.95     | 20  |
| 19                                 | Tromsø                                       | 0.43       | 0.34       | 0.02       | 0.17       | 0.04     | 82              | 0.02      | 0.02       | 0.71       | 0.21       | 0.04       | 84        | 0.01      | 0.16      | 0.52      | 0.29     | 0.02       | 82        | 0.00      | 0.00      | 0.04       | 0.96     | 58  |
| Barents Sea                        |                                              |            |            |            |            |          |                 |           |            |            |            |            |           |           |           |           |          |            |           |           |           |            |          |     |
| 20                                 | Kirkenes, NO                                 | 0.22       | 0.54       | 0.00       | 0.21       | 0.02     | 47              | 0.01      | 0.03       | 0.69       | 0.27       | 0.00       | 47        | 0.10      | 0.27      | 0.39      | 0.20     | 0.04       | 46        | 0.00      | 0.00      | 0.56       | 0.44     | 40  |
| 21                                 | Pechenga, RU                                 | 0.27       | 0.50       | 0.03       | 0.17       | 0.02     | 43              | 0.07      | 0.01       | 0.63       | 0.27       | 0.02       | 45        | 0.01      | 0.10      | 0.56      | 0.30     | 0.03       | 44        | 0.01      | 0.01      | 0.03       | 0.94     | 45  |
| 22                                 | Kola Bay, Abram Mys                          | 0.16       | 0.52       | 0.00       | 0.31       | 0.01     | 52              | 0.07      | 0.05       | 0.61       | 0.26       | 0.02       | 121       | 0.20      | 0.40      | 0.34      | 0.06     | 0.00       | 35        | 0.04      | 0.00      | 0.85       | 0.12     | 52  |
| 23                                 | Kola Bay, Mishukovo<br>Kola Bay, Tyuva inlet | 0.08       | 0.59       | 0.02       | 0.28       | 0.03     | 72              | 0.04      | 0.05       | 0.55       | 0.32       | 0.04       | 107       | 0.13      | 0.32      | 0.46      | 0.07     | 0.02       | 76        | 0.01      | 0.01      | 0.94       | 0.03     | 72  |
| 24                                 | (mussel clusters)<br>Kola Bay, Tyuva inlet   | 0.31       | 0.33       | 0.04       | 0.29       | 0.03     | 91              | 0.05      | 0.05       | 0.65       | 0.23       | 0.03       | 99        | 0.03      | 0.16      | 0.48      | 0.31     | 0.02       | 104       | 0.00      | 0.03      | 0.18       | 0.79     | 101 |
| 25                                 | (mussel bank)                                | 0.35       | 0.39       | 0.02       | 0.20       | 0.04     | 62              | 0.04      | 0.03       | 0.72       | 0.20       | 0.02       | 66        | 0.02      | 0.23      | 0.50      | 0.23     | 0.02       | 66        | 0.01      | 0.07      | 0.28       | 0.64     | 36  |
| 26                                 | Kildin Isl., Mogilnaya Inlet                 | 0.42       | 0.32       | 0.03       | 0.20       | 0.03     | 30              | 0.07      | 0.01       | 0.65       | 0.24       | 0.03       | 54        | 0.01      | 0.15      | 0.47      | 0.36     | 0.01       | 53        | 0.01      | 0.07      | 0.11       | 0.82     | 52  |
| 28                                 | Kildin Isl., Sunduki                         | 0.38       | 0.39       | 0.02       | 0.18       | 0.04     | 54              | 0.02      | 0.00       | 0.71       | 0.22       | 0.05       | 54        | 0.00      | 0.10      | 0.54      | 0.35     | 0.02       | 52        | 0.00      | 0.03      | 0.09       | 0.88     | 54  |
| 29                                 | Yarnishnaya 2001                             | 0.33       | 0.31       | 0.07       | 0.28       | 0.01     | 36              | 0.03      | 0.03       | 0.75       | 0.17       | 0.03       | 36        | 0.01      | 0.13      | 0.49      | 0.36     | 0.01       | 35        | 0.00      | 0.06      | 0.04       | 0.90     | 35  |

|           |                         |      |      |      |      |      |    |      |      |      |      |      |    |      |      |      |      |      |    |      |      |      |      |    |
|-----------|-------------------------|------|------|------|------|------|----|------|------|------|------|------|----|------|------|------|------|------|----|------|------|------|------|----|
| 30        | Yarnishnaya 2002        | 0.27 | 0.39 | 0.02 | 0.26 | 0.05 | 46 | 0.02 | 0.04 | 0.61 | 0.29 | 0.03 | 46 | 0.01 | 0.23 | 0.40 | 0.36 | 0.00 | 45 | 0.01 | 0.04 | 0.20 | 0.74 | 45 |
| 31        | Gremikha 2001           | 0.05 | 0.71 | 0.00 | 0.23 | 0.00 | 28 | 0.12 | 0.03 | 0.50 | 0.29 | 0.05 | 29 | 0.14 | 0.34 | 0.48 | 0.03 | 0.00 | 29 | 0.02 | 0.00 | 0.93 | 0.05 | 29 |
| 32        | Gremikha 2002           | 0.09 | 0.66 | 0.00 | 0.24 | 0.01 | 35 | 0.08 | 0.06 | 0.66 | 0.16 | 0.04 | 25 | 0.06 | 0.43 | 0.43 | 0.09 | 0.00 | 35 | 0.00 | 0.01 | 0.86 | 0.13 | 35 |
| 33        | Kanin Nos               | 0.49 | 0.34 | 0.01 | 0.13 | 0.03 | 54 | 0.04 | 0.01 | 0.60 | 0.34 | 0.01 | 57 | 0.00 | 0.11 | 0.57 | 0.32 | 0.00 | 56 | 0.00 | 0.04 | 0.01 | 0.96 | 57 |
| 34        | Dolgy Island            | 0.42 | 0.27 | 0.12 | 0.19 | 0.00 | 13 | 0.04 | 0.00 | 0.56 | 0.40 | 0.00 | 25 | 0.00 | 0.10 | 0.58 | 0.29 | 0.04 | 26 | 0.00 | 0.04 | 0.04 | 0.92 | 25 |
| 35        | Vaigach                 | 0.43 | 0.43 | 0.01 | 0.13 | 0.00 | 44 | 0.01 | 0.01 | 0.45 | 0.53 | 0.00 | 46 | 0.00 | 0.10 | 0.58 | 0.29 | 0.03 | 45 | 0.01 | 0.07 | 0.00 | 0.92 | 46 |
| White Sea |                         |      |      |      |      |      |    |      |      |      |      |      |    |      |      |      |      |      |    |      |      |      |      |    |
| 36        | Olenitsa                | 0.37 | 0.39 | 0.05 | 0.16 | 0.02 | 47 | 0.05 | 0.01 | 0.68 | 0.26 | 0.00 | 58 | 0.02 | 0.10 | 0.54 | 0.31 | 0.03 | 58 | 0.00 | 0.08 | 0.03 | 0.89 | 56 |
| 37        | Umba 2002               | 0.15 | 0.56 | 0.00 | 0.29 | 0.00 | 70 | 0.05 | 0.06 | 0.59 | 0.26 | 0.04 | 70 | 0.11 | 0.35 | 0.38 | 0.13 | 0.03 | 70 | 0.01 | 0.01 | 0.77 | 0.21 | 71 |
| 38        | Umba 2004               | 0.37 | 0.39 | 0.05 | 0.16 | 0.02 | *  | 0.07 | 0.00 | 0.67 | 0.24 | 0.02 | 23 | 0.00 | 0.07 | 0.52 | 0.41 | 0.00 | 23 | 0.00 | 0.04 | 0.00 | 0.96 | 12 |
| 39        | Luvenga                 | 0.35 | 0.32 | 0.02 | 0.26 | 0.05 | 44 | 0.06 | 0.01 | 0.74 | 0.18 | 0.01 | 48 | 0.01 | 0.15 | 0.41 | 0.41 | 0.01 | 39 | 0.00 | 0.01 | 0.08 | 0.91 | 37 |
| 40        | Kartesh 1990            | 0.43 | 0.21 | 0.03 | 0.30 | 0.04 | 40 | 0.09 | 0.03 | 0.74 | 0.15 | 0.00 | 40 | 0.03 | 0.15 | 0.44 | 0.38 | 0.00 | 33 | 0.02 | 0.09 | 0.02 | 0.88 | 28 |
| 41        | Matrenin 2001           | 0.38 | 0.33 | 0.02 | 0.24 | 0.02 | 42 | 0.02 | 0.01 | 0.68 | 0.27 | 0.02 | 45 | 0.01 | 0.11 | 0.62 | 0.24 | 0.01 | 45 | 0.01 | 0.00 | 0.03 | 0.96 | 45 |
| 42        | Keret                   | 0.45 | 0.30 | 0.07 | 0.16 | 0.02 | 28 | 0.03 | 0.02 | 0.63 | 0.30 | 0.01 | 43 | 0.02 | 0.07 | 0.48 | 0.42 | 0.02 | 30 | 0.00 | 0.00 | 0.02 | 0.98 | 29 |
| 43        | Rabocheostrovsk         | 0.34 | 0.36 | 0.00 | 0.30 | 0.00 | 22 | 0.10 | 0.01 | 0.68 | 0.21 | 0.00 | 48 | 0.01 | 0.18 | 0.50 | 0.30 | 0.01 | 37 | 0.01 | 0.03 | 0.02 | 0.93 | 44 |
| 44        | Solovetsky Island       | 0.65 | 0.18 | 0.06 | 0.12 | 0.00 | 17 | 0.00 | 0.00 | 0.66 | 0.34 | 0.00 | 19 | 0.00 | 0.08 | 0.69 | 0.22 | 0.00 | 18 | 0.00 | 0.03 | 0.00 | 0.97 | 19 |
| 45        | Tamitsa, Onega Bay      | 0.34 | 0.36 | 0    | 0.30 | 0    | *  | 0.04 | 0.00 | 0.56 | 0.38 | 0.02 | 24 | 0.00 | 0.09 | 0.47 | 0.34 | 0.09 | 16 | 0.02 | 0.00 | 0.02 | 0.96 | 24 |
| 46        | Una Inlet, Dvina Bay    | 0.35 | 0.38 | 0.08 | 0.17 | 0.03 | *  | 0.08 | 0.02 | 0.69 | 0.19 | 0.02 | 24 | 0.00 | 0.27 | 0.39 | 0.34 | 0.00 | 22 | 0.00 | 0.00 | 0.04 | 0.96 | 24 |
| 47        | Yagry Island, Dvina Bay | 0.35 | 0.38 | 0.08 | 0.17 | 0.03 | 52 | 0.07 | 0.04 | 0.68 | 0.20 | 0.01 | 71 | 0.04 | 0.15 | 0.38 | 0.41 | 0.03 | 70 | 0.02 | 0.01 | 0.05 | 0.92 | 71 |

\* For three samples, missing *Idh* data were replaced by those from a neighboring and genetically similar sample.

**Electronic supplement 2.** Circumboreal multilocus data set. Allele frequencies from 19 allozyme loci in 9 representative samples of pure *Mytilus trossulus* and *Mytilus edulis*. Sample codes are the same as in the Main data set (Fig. 1; Supplement 1)

---

Key to  
sample codes

---

***M. trossulus***

#1 NE Pacific, Whidbey Island Wa.  
 #2 NE Pacific, Driftwood Key Wa.  
 #3 NW Atlantic, St.Andrews N.B.  
 #22,23 NE Atlantic, Barents Sea, Kola Bay  
 #37 NE Atlantic, White Sea, Umba  
 #13 Northern Baltic, Tammisaari

***M. edulis***

#40 White Sea, Kartesh  
 #6 Barents Sea, Jarfjorden  
 #4 Maine, Searsport

---



---

| Locus /<br>Sample code | Sample<br>size | Allele<br>names/allele<br>frequencies |           |           |            |            |  |
|------------------------|----------------|---------------------------------------|-----------|-----------|------------|------------|--|
| <i>Est</i>             | <i>N</i>       | <i>80</i>                             | <i>90</i> | <i>95</i> | <i>100</i> | <i>110</i> |  |
| #1                     | 46             | 0.02                                  | 0.97      | 0.00      | 0.01       | 0.00       |  |
| #2                     | 53             | 0.01                                  | 0.94      | 0.01      | 0.02       | 0.02       |  |
| #3                     | 48             | 0.00                                  | 0.97      | 0.00      | 0.03       | 0.00       |  |
| #22,23                 | 38             | 0.00                                  | 0.95      | 0.03      | 0.01       | 0.01       |  |
| #37                    | 25             | 0.00                                  | 0.90      | 0.10      | 0.00       | 0.00       |  |
| #13                    | 46             | 0.00                                  | 0.84      | 0.16      | 0.00       | 0.00       |  |
| #40                    | 39             | 0.00                                  | 0.01      | 0.00      | 0.97       | 0.01       |  |
| #6                     | 26             | 0.00                                  | 0.00      | 0.00      | 0.96       | 0.04       |  |
| #4                     | 41             | 0.00                                  | 0.00      | 0.01      | 0.98       | 0.01       |  |

---

| <i>Ark</i> | <i>N</i> | <i>92</i> | <i>100</i> |
|------------|----------|-----------|------------|
| #1         | 44       | 0.08      | 0.92       |
| #2         | 56       | 0.01      | 0.99       |
| #3         | 51       | 0.31      | 0.69       |
| #22,23     | 40       | 0.21      | 0.79       |
| #37        | 23       | 0.41      | 0.59       |
| #13        | 51       | 0.08      | 0.92       |
| #40        | 38       | 0.21      | 0.79       |
| #6         | 29       | 0.17      | 0.83       |
| #4         | 48       | 0.44      | 0.56       |

| <i>Odh</i> (octopine dehydrogenase) | <i>N</i> | <i>80</i> | <i>85</i> | <i>90</i> | <i>95</i> | <i>100</i> | <i>105</i> | <i>108</i> | <i>110</i> | <i>112</i> |
|-------------------------------------|----------|-----------|-----------|-----------|-----------|------------|------------|------------|------------|------------|
| #1                                  | 33       | 0.00      | 0.00      | 0.00      | 0.23      | 0.17       | 0.53       | 0.05       | 0.03       | 0.00       |
| #2                                  | 58       | 0.01      | 0.02      | 0.03      | 0.11      | 0.26       | 0.52       | 0.03       | 0.01       | 0.03       |
| #3                                  | 61       | 0.02      | 0.01      | 0.02      | 0.02      | 0.16       | 0.76       | 0.02       | 0.00       | 0.00       |
| #22,23                              | 40       | 0.00      | 0.01      | 0.01      | 0.01      | 0.10       | 0.83       | 0.03       | 0.01       | 0.00       |
| #37                                 | 23       | 0.00      | 0.00      | 0.00      | 0.02      | 0.13       | 0.85       | 0.00       | 0.00       | 0.00       |
| #13                                 | 56       | 0.00      | 0.00      | 0.00      | 0.01      | 0.24       | 0.69       | 0.00       | 0.04       | 0.03       |
| #40                                 | 38       | 0.00      | 0.00      | 0.05      | 0.00      | 0.72       | 0.11       | 0.01       | 0.05       | 0.05       |
| #6                                  | 24       | 0.00      | 0.00      | 0.02      | 0.00      | 0.88       | 0.02       | 0.02       | 0.06       | 0.00       |
| #4                                  | 44       | 0.01      | 0.00      | 0.00      | 0.02      | 0.85       | 0.01       | 0.05       | 0.02       | 0.03       |

| <i>Pgm</i> | <i>N</i> | <i>90</i> | <i>95</i> | <i>100</i> | <i>110</i> | <i>115</i> | <i>120</i> | <i>125</i> | <i>130</i> |
|------------|----------|-----------|-----------|------------|------------|------------|------------|------------|------------|
| #1         | 28       | 0.00      | 0.00      | 0.05       | 0.27       | 0.02       | 0.50       | 0.14       | 0.02       |
| #2         | 37       | 0.00      | 0.00      | 0.05       | 0.26       | 0.01       | 0.57       | 0.08       | 0.03       |
| #3         | 34       | 0.00      | 0.00      | 0.07       | 0.24       | 0.01       | 0.59       | 0.06       | 0.03       |
| #22,23     | 40       | 0.02      | 0.00      | 0.05       | 0.23       | 0.03       | 0.57       | 0.05       | 0.05       |
| #37        | 24       | 0.00      | 0.02      | 0.08       | 0.23       | 0.00       | 0.60       | 0.06       | 0.00       |
| #13        | 44       | 0.00      | 0.00      | 0.03       | 0.15       | 0.01       | 0.72       | 0.08       | 0.01       |
| #40        | 27       | 0.07      | 0.04      | 0.54       | 0.15       | 0.00       | 0.13       | 0.07       | 0.00       |
| #6         | 26       | 0.02      | 0.02      | 0.81       | 0.15       | 0.00       | 0.00       | 0.00       | 0.00       |
| #4         | 46       | 0.05      | 0.03      | 0.87       | 0.04       | 0.00       | 0.00       | 0.00       | 0.00       |

| <i>Gpi</i> | <i>N</i> | <i>86</i> | <i>93</i> | <i>96</i> | <i>98</i> | <i>100</i> | <i>102</i> | <i>105</i> | <i>107</i> | <i>110</i> |
|------------|----------|-----------|-----------|-----------|-----------|------------|------------|------------|------------|------------|
| #1         | 42       | 0.04      | 0.23      | 0.06      | 0.56      | 0.08       | 0.04       | 0.00       | 0.00       | 0.00       |
| #2         | 60       | 0.04      | 0.15      | 0.03      | 0.63      | 0.11       | 0.04       | 0.00       | 0.01       | 0.00       |
| #3         | 60       | 0.08      | 0.16      | 0.08      | 0.61      | 0.05       | 0.02       | 0.00       | 0.00       | 0.00       |
| #22,23     | 40       | 0.09      | 0.05      | 0.14      | 0.57      | 0.11       | 0.04       | 0.00       | 0.00       | 0.00       |
| #37        | 27       | 0.20      | 0.11      | 0.19      | 0.44      | 0.02       | 0.02       | 0.02       | 0.00       | 0.00       |
| #13        | 52       | 0.02      | 0.01      | 0.00      | 0.96      | 0.00       | 0.00       | 0.00       | 0.01       | 0.00       |
| #40        | 37       | 0.01      | 0.01      | 0.00      | 0.03      | 0.03       | 0.24       | 0.01       | 0.64       | 0.03       |
| #6         | 25       | 0.02      | 0.02      | 0.00      | 0.02      | 0.06       | 0.20       | 0.10       | 0.56       | 0.02       |
| #4         | 46       | 0.04      | 0.05      | 0.01      | 0.03      | 0.12       | 0.34       | 0.16       | 0.21       | 0.03       |

| <i>Idh-1 (liver)</i> | <i>N</i> | <i>87</i> | <i>93</i> | <i>100</i> | <i>102</i> | <i>107</i> | <i>114</i> |
|----------------------|----------|-----------|-----------|------------|------------|------------|------------|
| #1                   | 48       | 0.01      | 0.03      | 0.60       | 0.00       | 0.33       | 0.02       |
| #2                   | 62       | 0.00      | 0.05      | 0.71       | 0.00       | 0.23       | 0.01       |
| #3                   | 63       | 0.00      | 0.02      | 0.73       | 0.00       | 0.24       | 0.01       |
| #22,23               | 40       | 0.01      | 0.11      | 0.65       | 0.00       | 0.21       | 0.01       |
| #37                  | 27       | 0.02      | 0.07      | 0.65       | 0.00       | 0.26       | 0.00       |
| #13                  | 55       | 0.00      | 0.00      | 0.79       | 0.00       | 0.21       | 0.00       |
| #40                  | 42       | 0.02      | 0.40      | 0.20       | 0.02       | 0.31       | 0.04       |
| #6                   | 29       | 0.00      | 0.29      | 0.50       | 0.02       | 0.17       | 0.02       |
| #4                   | 48       | 0.04      | 0.61      | 0.20       | 0.04       | 0.10       | 0.00       |

| <i>Ap (=Pep)</i> | <i>N</i> | <i>90</i> | <i>95</i> | <i>100</i> | <i>105</i> | <i>110</i> |
|------------------|----------|-----------|-----------|------------|------------|------------|
| #1               | 44       | 0.00      | 0.10      | 0.70       | 0.19       | 0.00       |
| #2               | 55       | 0.06      | 0.05      | 0.70       | 0.17       | 0.01       |
| #3               | 69       | 0.17      | 0.05      | 0.38       | 0.34       | 0.05       |
| #22,23           | 40       | 0.06      | 0.05      | 0.55       | 0.33       | 0.01       |
| #37              | 26       | 0.04      | 0.08      | 0.63       | 0.23       | 0.02       |
| #13              | 48       | 0.05      | 0.00      | 0.90       | 0.05       | 0.00       |
| #40              | 41       | 0.07      | 0.02      | 0.74       | 0.16       | 0.00       |
| #6               | 29       | 0.07      | 0.03      | 0.66       | 0.21       | 0.03       |
| #4               | 49       | 0.23      | 0.03      | 0.32       | 0.41       | 0.01       |

| <i>Lap</i> | <i>N</i> | <i>92</i> | <i>94</i> | <i>96</i> | <i>98</i> | <i>100</i> |
|------------|----------|-----------|-----------|-----------|-----------|------------|
| #1         | 39       | 0.09      | 0.58      | 0.28      | 0.04      | 0.01       |
| #2         | 44       | 0.01      | 0.41      | 0.50      | 0.08      | 0.00       |
| #3         | 67       | 0.11      | 0.32      | 0.44      | 0.11      | 0.01       |
| #22,23     | 25       | 0.20      | 0.30      | 0.44      | 0.04      | 0.02       |
| #37        | 26       | 0.12      | 0.40      | 0.38      | 0.06      | 0.04       |
| #13        | 57       | 0.00      | 0.12      | 0.28      | 0.00      | 0.60       |
| #40        | 35       | 0.03      | 0.14      | 0.47      | 0.36      | 0.00       |
| #6         | 27       | 0.00      | 0.06      | 0.57      | 0.35      | 0.02       |
| #4         | 46       | 0.01      | 0.05      | 0.41      | 0.51      | 0.01       |

| <i>Aap</i> (alanine<br>aminopeptidase) | <i>N</i> | <i>90</i> | <i>95</i> | <i>100</i> | <i>105</i> |
|----------------------------------------|----------|-----------|-----------|------------|------------|
| #1                                     | 36       | 0.15      | 0.36      | 0.47       | 0.01       |
| #2                                     | 49       | 0.17      | 0.41      | 0.39       | 0.03       |
| #3                                     | 57       | 0.18      | 0.48      | 0.32       | 0.02       |
| #22,23                                 | 40       | 0.21      | 0.19      | 0.57       | 0.02       |
| #37                                    | 27       | 0.19      | 0.28      | 0.54       | 0.00       |
| #13                                    | 43       | 0.01      | 0.12      | 0.70       | 0.18       |
| #40                                    | 31       | 0.02      | 0.13      | 0.77       | 0.08       |
| #6                                     | 28       | 0.04      | 0.23      | 0.68       | 0.05       |
| #4                                     | 48       | 0.02      | 0.09      | 0.85       | 0.03       |

| <i>Mpi</i> | <i>N</i> | <i>87</i> | <i>90</i> | <i>94</i> | <i>100</i> |
|------------|----------|-----------|-----------|-----------|------------|
| #1         | 46       | 0.03      | 0.00      | 0.95      | 0.02       |
| #2         | 43       | 0.05      | 0.00      | 0.94      | 0.01       |
| #3         | 62       | 0.01      | 0.01      | 0.96      | 0.02       |
| #22,23     | 40       | 0.01      | 0.01      | 0.94      | 0.04       |
| #37        | 27       | 0.00      | 0.00      | 0.98      | 0.02       |
| #13        | 53       | 0.07      | 0.00      | 0.85      | 0.08       |
| #40        | 26       | 0.02      | 0.10      | 0.02      | 0.87       |
| #6         | 23       | 0.00      | 0.00      | 0.00      | 1.00       |
| #4         | 44       | 0.01      | 0.03      | 0.01      | 0.94       |



| <b><i>Eno</i></b><br>(enolase) | <b><i>N</i></b> | <b><i>90</i></b> | <b><i>100</i></b> | <b><i>108</i></b> | <b><i>116</i></b> |
|--------------------------------|-----------------|------------------|-------------------|-------------------|-------------------|
| #1                             | 41              | 0.00             | 0.30              | 0.67              | 0.02              |
| #2                             | 52              | 0.02             | 0.40              | 0.56              | 0.02              |
| #3                             | 39              | 0.00             | 0.60              | 0.38              | 0.01              |
| #22,23                         | 36              | 0.01             | 0.39              | 0.54              | 0.06              |
| #37                            | 19              | 0.03             | 0.42              | 0.50              | 0.05              |
| #13                            | 48              | 0.02             | 0.85              | 0.13              | 0.00              |
| #40                            | 42              | 0.00             | 0.94              | 0.06              | 0.00              |
| #6                             | 26              | 0.00             | 0.90              | 0.10              | 0.00              |
| #4                             | 48              | 0.00             | 0.91              | 0.09              | 0.00              |

| <b><i>Aat-1</i></b> | <b><i>N</i></b> | <b><i>90</i></b> | <b><i>95</i></b> | <b><i>100</i></b> | <b><i>105</i></b> | <b><i>112</i></b> |
|---------------------|-----------------|------------------|------------------|-------------------|-------------------|-------------------|
| #1                  | 48              | 0.02             | 0.01             | 0.86              | 0.01              | 0.09              |
| #2                  | 66              | 0.00             | 0.02             | 0.86              | 0.02              | 0.10              |
| #3                  | 68              | 0.00             | 0.00             | 0.99              | 0.01              | 0.01              |
| #22,23              | 36              | 0.00             | 0.00             | 0.99              | 0.00              | 0.01              |
| #37                 | 19              | 0.00             | 0.00             | 0.95              | 0.00              | 0.05              |
| #13                 | 59              | 0.00             | 0.10             | 0.87              | 0.00              | 0.03              |
| #40                 | 42              | 0.01             | 0.01             | 0.92              | 0.00              | 0.06              |
| #6                  | 29              | 0.00             | 0.00             | 0.97              | 0.00              | 0.03              |
| #4                  | 48              | 0.01             | 0.00             | 0.96              | 0.00              | 0.03              |

| <b><i>Tpi</i></b> | <b><i>N</i></b> | <b><i>75</i></b> | <b><i>80</i></b> | <b><i>90</i></b> | <b><i>100</i></b> | <b><i>110</i></b> | <b><i>115</i></b> |
|-------------------|-----------------|------------------|------------------|------------------|-------------------|-------------------|-------------------|
| #1                | 24              | 0.00             | 0.00             | 0.00             | 0.94              | 0.00              | 0.06              |
| #2                | 41              | 0.00             | 0.01             | 0.04             | 0.88              | 0.02              | 0.05              |
| #3                | 35              | 0.01             | 0.00             | 0.01             | 0.90              | 0.00              | 0.07              |
| #22,23            | 31              | 0.00             | 0.02             | 0.00             | 0.90              | 0.05              | 0.03              |
| #37               | 19              | 0.00             | 0.03             | 0.00             | 0.82              | 0.05              | 0.11              |
| #13               | 34              | 0.03             | 0.01             | 0.01             | 0.94              | 0.00              | 0.00              |
| #40               | 24              | 0.00             | 0.00             | 0.00             | 1.00              | 0.00              | 0.00              |
| #6                | 24              | 0.00             | 0.00             | 0.00             | 1.00              | 0.00              | 0.00              |
| #4                | 49              | 0.06             | 0.00             | 0.00             | 0.90              | 0.00              | 0.04              |

| <i>Me</i> | <i>N</i> | <b>90</b> | <b>96</b> | <b>100</b> | <b>104</b> | <b>107</b> | <b>110</b> | <b>115</b> |
|-----------|----------|-----------|-----------|------------|------------|------------|------------|------------|
| #1        | 39       | 0.03      | 0.00      | 0.45       | 0.40       | 0.09       | 0.03       | 0.01       |
| #2        | 56       | 0.01      | 0.01      | 0.53       | 0.39       | 0.03       | 0.03       | 0.01       |
| #3        | 53       | 0.03      | 0.00      | 0.75       | 0.16       | 0.06       | 0.00       | 0.00       |
| #22,23    | 33       | 0.05      | 0.00      | 0.86       | 0.00       | 0.00       | 0.05       | 0.05       |
| #37       | 9        | 0.00      | 0.00      | 0.94       | 0.00       | 0.00       | 0.00       | 0.06       |
| #13       | 39       | 0.00      | 0.01      | 0.90       | 0.08       | 0.00       | 0.00       | 0.01       |
| #40       | 36       | 0.00      | 0.06      | 0.88       | 0.04       | 0.03       | 0.00       | 0.00       |
| #6        | 3        | 0.00      | 0.00      | 1.00       | 0.00       | 0.00       | 0.00       | 0.00       |
| #4        | 46       | 0.00      | 0.09      | 0.74       | 0.11       | 0.07       | 0.00       | 0.00       |

| <i>Pgd</i> | <i>N</i> | <b>90</b> | <b>95</b> | <b>100</b> | <b>104</b> | <b>107</b> | <b>110</b> | <b>116</b> |
|------------|----------|-----------|-----------|------------|------------|------------|------------|------------|
| #1         | 37       | 0.08      | 0.03      | 0.55       | 0.22       | 0.11       | 0.00       | 0.01       |
| #2         | 51       | 0.04      | 0.03      | 0.57       | 0.25       | 0.05       | 0.05       | 0.02       |
| #3         | 62       | 0.09      | 0.04      | 0.78       | 0.00       | 0.01       | 0.06       | 0.02       |
| #22,23     | 36       | 0.00      | 0.00      | 0.60       | 0.39       | 0.01       | 0.00       | 0.00       |
| #37        | 18       | 0.00      | 0.00      | 0.69       | 0.28       | 0.03       | 0.00       | 0.00       |
| #13        | 41       | 0.02      | 0.01      | 0.94       | 0.00       | 0.00       | 0.02       | 0.00       |
| #40        | 32       | 0.00      | 0.00      | 0.97       | 0.00       | 0.00       | 0.02       | 0.02       |
| #6         | 29       | 0.07      | 0.00      | 0.90       | 0.00       | 0.00       | 0.03       | 0.00       |
| #4         | 49       | 0.02      | 0.00      | 0.96       | 0.00       | 0.00       | 0.02       | 0.00       |

| <i>Pgk</i> | <i>N</i> | <b>86</b> | <b>90</b> | <b>100</b> | <b>110</b> | <b>115</b> |
|------------|----------|-----------|-----------|------------|------------|------------|
| #1         | 40       | 0.04      | 0.01      | 0.88       | 0.03       | 0.05       |
| #2         | 31       | 0.02      | 0.03      | 0.87       | 0.07       | 0.02       |
| #3         | 29       | 0.02      | 0.00      | 0.88       | 0.11       | 0.00       |
| #22,23     | 22       | 0.02      | 0.00      | 0.86       | 0.11       | 0.00       |
| #37        | 19       | 0.00      | 0.03      | 0.87       | 0.08       | 0.03       |
| #13        | 44       | 0.01      | 0.01      | 0.93       | 0.05       | 0.00       |
| #40        | 31       | 0.03      | 0.02      | 0.90       | 0.03       | 0.02       |
| #6         | 24       | 0.00      | 0.00      | 0.94       | 0.00       | 0.06       |
| #4         | 33       | 0.00      | 0.07      | 0.92       | 0.00       | 0.00       |

| <i>Mdh-1</i> | <i>N</i> | <i>85</i> | <i>100</i> | <i>115</i> |
|--------------|----------|-----------|------------|------------|
| #1           | 44       | 0.00      | 1.00       | 0.00       |
| #2           | 32       | 0.00      | 0.98       | 0.02       |
| #3           | 48       | 0.01      | 0.99       | 0.00       |
| #22,23       | 21       | 0.00      | 1.00       | 0.00       |
| #37          | 19       | 0.00      | 1.00       | 0.00       |
| #13          | 45       | 0.00      | 1.00       | 0.00       |
| #40          | 32       | 0.00      | 1.00       | 0.00       |
| #6           | 29       | 0.02      | 0.98       | 0.00       |
| #4           | 48       | 0.00      | 1.00       | 0.00       |

| <i>Idh-2</i><br>(muscle) | <i>N</i> | <i>80</i> | <i>85</i> | <i>90</i> | <i>100</i> | <i>110</i> |
|--------------------------|----------|-----------|-----------|-----------|------------|------------|
| #1                       | 48       | 0.00      | 0.01      | 0.00      | 0.98       | 0.01       |
| #2                       | 46       | 0.00      | 0.01      | 0.00      | 0.99       | 0.00       |
| #3                       | 66       | 0.00      | 0.00      | 0.01      | 0.99       | 0.00       |
| #22,23                   | 21       | 0.00      | 0.00      | 0.02      | 0.98       | 0.00       |
| #37                      | 19       | 0.00      | 0.00      | 0.00      | 1.00       | 0.00       |
| #13                      | 40       | 0.00      | 0.00      | 0.04      | 0.95       | 0.01       |
| #40                      | 32       | 0.00      | 0.00      | 0.16      | 0.84       | 0.00       |
| #6                       | 29       | 0.02      | 0.10      | 0.03      | 0.84       | 0.00       |
| #4                       | 48       | 0.01      | 0.02      | 0.02      | 0.95       | 0.00       |

| <i>Aat-2</i> |    | <i>90</i> | <i>92</i> | <i>100</i> | <i>110</i> |
|--------------|----|-----------|-----------|------------|------------|
| #1           | 48 | 0.00      | 0.00      | 0.98       | 0.02       |
| #2           | 58 | 0.00      | 0.00      | 1.00       | 0.00       |
| #3           | 65 | 0.00      | 0.01      | 0.93       | 0.06       |
| #22,23       | 21 | 0.00      | 0.05      | 0.90       | 0.05       |
| #37          | 19 | 0.00      | 0.00      | 1.00       | 0.00       |
| #13          | 57 | 0.00      | 0.00      | 1.00       | 0.00       |
| #40          | 42 | 0.00      | 0.00      | 1.00       | 0.00       |
| #6           | 29 | 0.03      | 0.00      | 0.97       | 0.00       |
| #4           | 48 | 0.02      | 0.00      | 0.98       | 0.00       |

**Electronic supplement 3.** Baltic-North Sea data set (data for Figure 2): *Gpi* allele frequencies across intra-Baltic and Baltic Sea–North Sea transects. The table displays the pooled “slow” *T* allele *Gpi*<sup>[<100]</sup> (a nearly-diagnostic *M. trossulus* marker). Intra-Baltic data with sample codes Bx are from Väinölä (1985), data with codes #x are from the *Main data set* (Electronic supplement 1), letter-codes a–o are new data (samples from 1986-1987).

| Sample code | Sampling site, region                  | <i>Gpi</i> allele frequency | Sample size <i>N</i> |
|-------------|----------------------------------------|-----------------------------|----------------------|
| Baltic Sea  |                                        |                             |                      |
| B1          | Raippaluoto, Bothnian Sea              | 0.99                        | 208                  |
| B2          | Sideby udd, Bothnian Sea               | 1.00                        | 198                  |
| B3          | Rauma, Bothnian Sea                    | 0.99                        | 155                  |
| B4          | Eckerö, Åland Islands                  | 0.99                        | 113                  |
| B5          | Lumparland, Åland Islands              | 0.99                        | 146                  |
| B6          | Nauvo, Archipelago Sea                 | 1.00                        | 157                  |
| B7          | Gullkrona fjärd, Archipelago Sea       | 0.99                        | 142                  |
| B8          | Dragsfjärd, Archipelago Sea            | 0.99                        | 306                  |
| B9          | Hiittinen, Archipelago Sea             | 0.99                        | 162                  |
| B10         | Hanko NE, Archipelago Sea              | 1.00                        | 132                  |
| B11         | Hanko SE, Gulf of Finland              | 0.98                        | 198                  |
| B12         | Porkkala, Gulf of Finland              | 0.98                        | 170                  |
| B13         | Espoo, Gulf of Finland                 | 0.99                        | 201                  |
| B14         | Helsinki Sirpalesaari, Gulf of Finland | 0.97                        | 139                  |
| B15         | Sipoo Kaunissaari, Gulf of Finland     | 0.97                        | 76                   |
| B16         | Pellinki, Gulf of Finland              | 0.99                        | 145                  |
| B17         | Haapasaari, Gulf of Finland            | 1.00                        | 206                  |
| B18         | Keibu Laht, Estonia, Gulf of Finland   | 0.98                        | 177                  |
| B19         | Stavsnäs, E Sweden                     | 0.99                        | 100                  |
| B20         | Arkösund, E Sweden                     | 1.00                        | 203                  |
| B21         | Äleklinta, Öland, E Sweden             | 0.98                        | 125                  |
| B22         | Gårdby, Öland, E Sweden                | 0.96                        | 85                   |
| B23         | Ronneby, S Sweden                      | 0.97                        | 219                  |
| #10         | Sölvesborg, S Sweden                   | 0.98                        | 120                  |
| a           | Kåseberga, S Sweden                    | 0.97                        | 123                  |
| B24         | Ystad, S Sweden (1981)                 | 0.96                        | 153                  |
| b           | Ystad, S Sweden (1987)                 | 0.97                        | 215                  |
| c           | Sopot, Gulf of Gdansk (Poland)         | 0.99                        | 147                  |
| d           | Skåre, S Sweden                        | 0.94                        | 120                  |
| e           | Rødby, Sjælland, Denmark               | 0.87                        | 120                  |
| f           | Gedser, Møn, Denmark                   | 0.69                        | 120                  |

---

|                               |                              |      |     |
|-------------------------------|------------------------------|------|-----|
| Öresund (Swedish coast)       |                              |      |     |
| g                             | Skånör, S Sweden             | 0.81 | 120 |
| h                             | Limhamn, Öresund             | 0.75 | 120 |
| i                             | Vikhög, Öresund              | 0.81 | 120 |
| j                             | Landskrona, Öresund          | 0.37 | 120 |
| k                             | Råå, Öresund                 | 0.37 | 169 |
| l                             | Hittarp, Öresund             | 0.36 | 123 |
| Kattegat-Skagerrak -North Sea |                              |      |     |
| m                             | Höganäs, Kattegat, Sweden    | 0.25 | 157 |
| n                             | Halmstad, Kattegat, Sweden   | 0.30 | 123 |
| #8                            | Egense, Kattegat, Denmark    | 0.21 | 114 |
| o                             | Galtö, Skagerrak, Sweden     | 0.13 | 90  |
| #7                            | Hjerting, North Sea, Denmark | 0.05 | 152 |

---

**Electronic supplement 4.** Frequencies of pooled *Mytilus trossulus* alleles (*T* alleles, see Table 2) at the four principal allozyme loci, in reference samples used for constructing the population mixing index scales for Figures 4, 5, 6.

| Population (taxon) |             |                                     | Locus      |            |            |            |
|--------------------|-------------|-------------------------------------|------------|------------|------------|------------|
|                    |             |                                     | <i>Est</i> | <i>Gpi</i> | <i>Pgm</i> | <i>Odh</i> |
| #3                 | St. Andrews | (NWA <i>M. trossulus</i> )          | 0.97       | 0.93       | 0.92       | 0.78       |
| #6                 | Jarfjord    | (NEA Barents Sea <i>M. edulis</i> ) | 0.00       | 0.05       | 0.15       | 0.02       |
| #13                | Tammisaari  | (Baltic <i>M. trossulus</i> )       | 1.00       | 0.99       | 0.97       | 0.68       |
| #7                 | Hjerting    | (North Sea <i>M. edulis</i> )       | 0.02       | 0.05       | 0.26       | 0.02       |
